# Supplementary material for: A novel polymer as a functional dielectric layer for OTFTs to improve the grain size of the pentacene semiconductor
Source: Royal Society of Chemistry journal article supplement (doi:10.1039/c5py01982f), 2016-01-01
Supplement: c5py01982f1.pdf [file c5py01982f1.pdf]

## Supporting Information

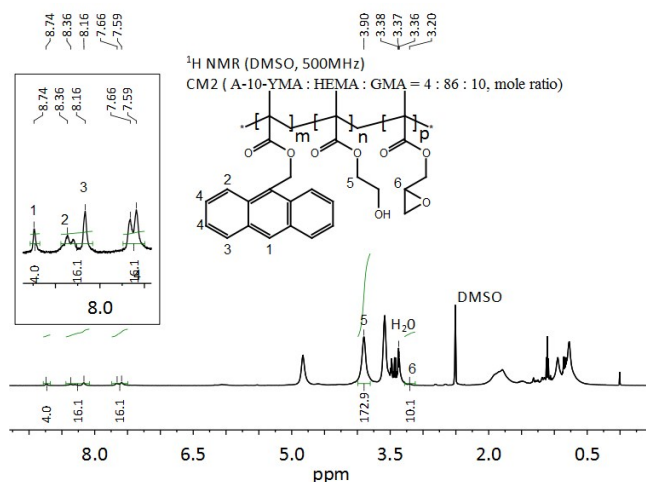

**Figure S1.** The  $^1\text{H}$  NMR spectrum and structure of CM2 (DMSO, 500 MHz).

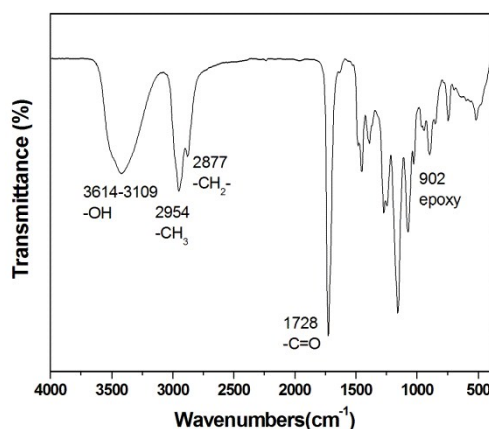

**Figure S2.** The FT-IR spectrum of CM2.

The CM2 characterization:  $^1\text{H}$  NMR (DMSO, 500 MHz,  $\delta$ , ppm): 8.74 (s, 4H), 8.26 (d,  $J = 100.4$  Hz, 16H), 7.62 (d,  $J = 34.0$  Hz, 16H), 3.90 (s, 172H), 3.20 (s, 10H). FT-IR (KBr,  $\text{cm}^{-1}$ ): 3645-3068 (s, -OH), 2958 (s, -CH<sub>3</sub>), 2881 (s, -CH<sub>2</sub>-), 1728(vs, -C=O), 1488, 1454 (m, benzene), 1404 (m, -CH<sub>2</sub>), 902, 848 (w, epoxy), 1153, 1068 (vs, -C-O), 945 (w,  $\gamma$  CH<sub>2</sub>).

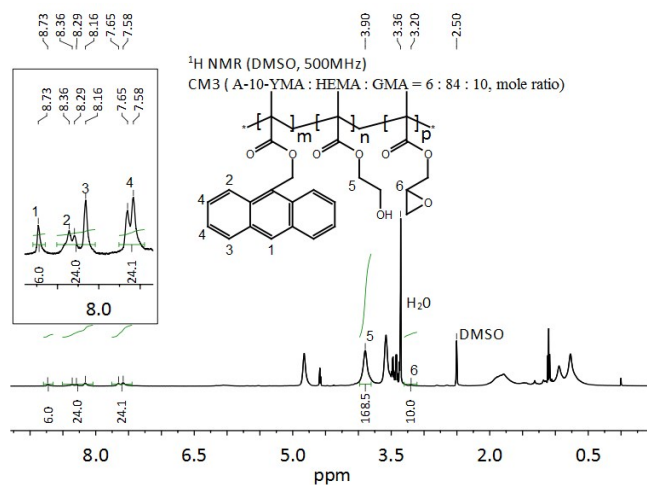

**Figure S3.** The <sup>1</sup>H NMR spectrum and structure of CM3 (DMSO, 500 MHz).

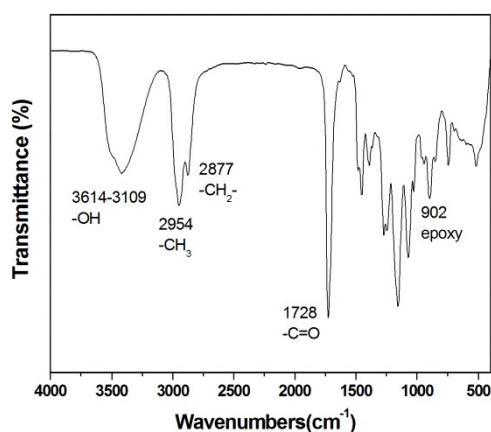

**Figure S4.** The FT-IR spectrum of CM3.

The CM3 characterization: <sup>1</sup>H NMR (DMSO, 500 MHz,  $\delta$ , ppm): 8.73 (s, 6H), 8.51 – 8.04 (m, 24H), 7.62 (d,  $J = 35.1$  Hz, 24H), 3.90 (s, 168H), 3.20 (s, 10H). FT-IR (KBr,  $\text{cm}^{-1}$ ): 3645-3068 (s, -OH), 2958 (s, -CH<sub>3</sub>), 2881 (s, -CH<sub>2</sub>-), 1728(vs, -C=O), 1488, 1454 (m, benzene), 1404 (m, -CH<sub>2</sub>), 902, 848 (w, epoxy), 1153, 1068 (vs, -C-O), 945 (w,  $\gamma$  CH<sub>2</sub>).

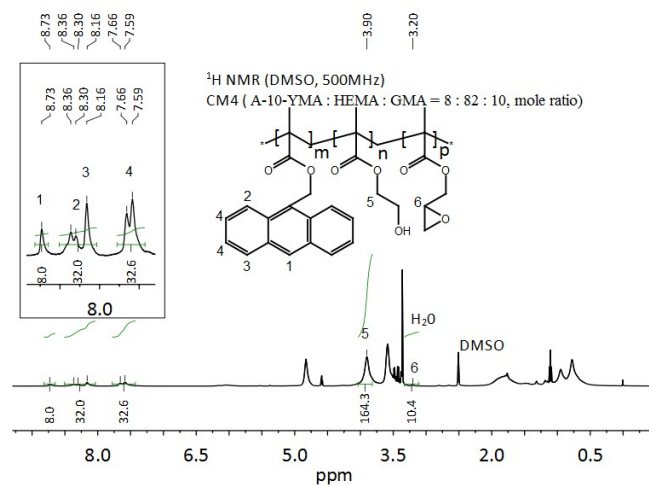

**Figure S5.** The  $^1\text{H}$  NMR spectrum and structure of CM4 (DMSO, 500 MHz).

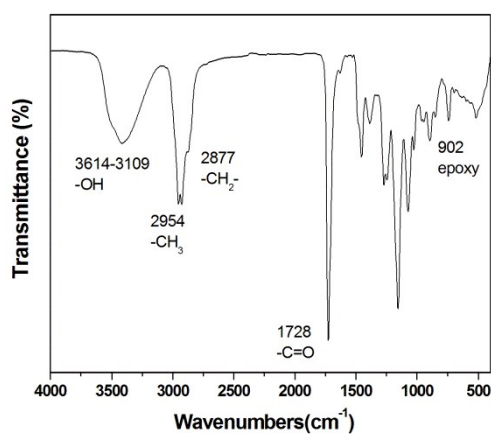

**Figure S6.** The FT-IR spectrum of CM4.

The CM4 characterization:  $^1\text{H}$  NMR (DMSO, 500 MHz,  $\delta$ , ppm): 8.73 (s, 8H), 8.51 – 8.04 (m, 32H), 7.62 (d,  $J = 35.6$  Hz, 33H), 3.90 (s, 164H), 3.20 (s, 10H). FT-IR (KBr,  $\text{cm}^{-1}$ ): 3645-3068 (s, -OH), 2958 (s, -CH<sub>3</sub>), 2881 (s, -CH<sub>2</sub>-), 1728(vs, -C=O), 1488, 1454 (m, benzene), 1404 (m, -CH<sub>2</sub>), 902, 848 (w, epoxy), 1153, 1068 (vs, -C-O), 945 (w,  $\gamma$  CH<sub>2</sub>).
